# Supplementary material for: Quadratic Genomic Selection Index Boosts Multi-Trait Genetic Gain in Modern Plant Breeding
Source: Research Square preprint supplement (doi:10.21203/rs.3.rs-7557747/v1), 2025-09-16
Supplement: Supplementary file 1 [file 321a551cbf6e1ac7ba24d4b6.docx]

**Quadratic Genomic Selection Index Boosts Multi-Trait Genetic Gain in Modern Plant Breeding**

J. Jesus Cerón-Rojas1, Osval A. Montesinos-López2, Abelardo Montesinos-López3, Paolo Vitale4, Paulino Pérez-Rodríguez1, Samuel B. Fernandes5, Rodomiro Ortiz6, and José Crossa1

**Supplementary Material A**

**The quadratic net genetic merit** can be writing as

, (S1)

where is the vector of breeding values with multivariate normal distribution, null mean, and covariance matrix , and is a vector of known economic weights. In addition, matrix can be written as

,

where the *i*th diagonal values (1,2, …, *t* ) is the relative economic weight associated to the genetic value of the *i*th squared trait and (1,2, …, *t* ) is the economic weight of the cross products between the genetic values of traits and . Note that the elements of matrix might be different to the elements of vector 8. The expectation and variance of equation (S1) are and , respectively.

**The quadratic phenotypic selection index (QPSI)**

This index is a predictor of equation (S1) andcan be written as

(S2)

where is the vector of adjusted and centered mean phenotypic values, with multivariate normal distribution, zero mean (), and covariance matrix ,  whereas is a vector of linear coefficients, and

is a matrix where the *i*th diagonal values (1,2, …, *t* ) is the index weight for the square of the phenotypic value, and (1,2, …, *t* ) is the index weight for the cross products between the and trait phenotype values. In the univariate case, equation (S2) reduces to

,

whereas in the bivariate case, this index can be written as

.

Therefore, in equation (S2) is the vector of directional selection gradients, and is the matrix of nonlinear selection gradients. The diagonal elements () of are the stabilizing/disruptive selection gradient for trait , and is a covariance or correlational selection gradient for traits and .

**Minimizing the mean square prediction error (MSPE) of**

To obtain the vector () and the matrix () values that maximize the selection response and the correlation between and , we can minimize the mean square prediction error (MSPE), which is the expectation of the square difference between and 8 and can be written as

. (S3)

To find the and values that minimize equation (S3) it is necessary to derivative this equation with respect to and , equate the result of the derivative to zero, and isolate and . The first partial derivatives result of equation (S3) with respect to and when the vector of trait phenotypic values is null () are8, respectively,

and , (S4)

which minimize . It is possible to show that the second partial derivatives of equation (S3) respect to and are positive and then, in effect, equation (S4) minimize .

By equation (S4), the minimized value is

, (S5)

where is the LPSI MSPE, whereas is the additional quadratic MSPE. Therefore, when and , the QPSI prediction MSPE (equation S5) should be higher than the LPSI MSPE. The accuracy of the estimated values will depend of the estimated values, which, in the asymptotic context should tend to the values. This is true because the increase of the number of genotypes and environment where the traits are evaluated only affects matrices and , and then, the multi-trait heritability (), which should tend to the identity matrix. In this last case, the minimized value is zero, that is, .

**The square correlation between and**

Because and arequadratic,a good option to measure the relationship between and when and , is the square correlation32 between and , that is,

, (S6)

where = is the variance of , and = is the variance of , whereas is the covariance between and . Equation (S6) indicates that for and , = 8.

**The QPSI selection response**

The QPSI selection response8 is

, (S7)

where is the selection intensity of the QPSI, whereas , and . Equation (S7) was originally obtained in the bivariate normal context2, however, since is usually a fixed constant, the relative genetic progress depends on and not on *,* so lack of normality is not so important for predicting relative genetic progress as for predicting absolute genetic progress8.

In the asymptotic context, when (an identity matrix of order ), equation (S7) is equal to , the square root of the variance of equation (S1), whereas equation (S6) is equal to 1.0, as we would expect. Equations (S6) and (S7) indicate that the LPSI and QPSI are related, and the only difference between them is the trace of the quadratic terms.

**The QPSI expected genetic gain per trait**

Since the covariance between and (equation S1) is 32, the QPSI expected genetic gain per trait is the LPSI expected genetic gain per trait, that is,

, (S8)

where is the standard deviation of the variance of the LPSI6. This means that as the values are equal for linear and quadratic indices, the genetic response due to the quadratic term of the index is neglected in equation (S8) because it uses a linear regression of the on 32.

**Supplementary material B**

**Quadratic genomics selection index (QGSI)**

This index is an application of the QLPSI theory (Supplementary material A, equations S1 to S8) and the linear genomic selection index (LGSI)5 to the genomics selection context. We shall construct the QGSI based on the vector of individual genomic breeding values . In this context, vector (1, 2,…,; number of traits) can be written as

(S9.1)

where is an matrix (*n*=number of observations and *m*=number of markers in the population) of coded marker values (, and for genotypes *AA*, *Aa*, and *aa*, respectively; is the frequency of allele *A*, and is the frequency of allele *a*) associated with the additive effects of the quantitative trait loci (QTL) and is an vector of the additive effects of the QTL associated with markers that affect the trait. It is assumed that has multivariate normal distribution with null mean and covariance matrix , where is the additive genomic variance of and is the additive genomic relationship matrix between individuals; in an F2 population, and in a double haploid population.

In the genomics selection context, the covariance between and (equation S1) is equal to 33, therefore, the covariance matrix between and is

, (S9.2)

a matrix of size where is the additive genomic covariance of and (1, 2,…,). By this last result, after the first selection cycle (in which there are phenotypic and marker information), it is usually assumed that

, (S9.3)

because, in the genomics selection context, in cycle two, breeders only have markers information.

By equation S2 (Supplementary Material A) and by the earlier results, the quadratic genomic selection index can be written as

, (S10)

where is the vector of linear coefficients and

is a matrix where the diagonal values (1,2, …, *t* ) is the index weight for the square value of and (1,2, …, *t* ) is the index weight for the cross products between and , in a similar manner as for matrix (Supplementary Material A, equation S2). The expectation and variance of , and the covariance between and are

, , and ,

respectively.

**QGSI mean square prediction error (MSPE)**

The QGSI MSPE can be written as

.

Using basic algebra, it is possible to show that

,

,

and

,

from where the QGSI MSPE is equal to

. (S11)

**Minimizing the QGSI mean square prediction error**

The firsts partial derivatives of equation (S11) with respect to and , are, respectively,

and ,

therefore, by equation (S9.2 and S9.3),

and . (S12)

In addition, note that the second partial derivatives of equation (S11) with respect to and are and , respectively. This means that, in effect, equation (S12) minimizes .

By equation (S12) and the assumption (equation S9.3), the minimized value is

. (S13)

In theory, equation (S13) is the desirable expected value of when this is minimized; however, in practice, only in the asymptotic context, when the number of markers tend to infinite. This means that in genomic selection the true prediction error variance always will be higher than the estimated prediction error variance.

**The correlation between and**

According with equation (S6), a good measure of the relationship between and when and , is the square correlation between them, that is,

, (S14)

where all the parameters were defined earlier. Note that equation (S14) only can be estimated with simulated data, and when , this equation is equal to 1.0.

**The QGSI selection response and expected genetic gain per trait**

When and , the QGSI selection response and expected genetic gain per trait are

, (S15)

and

, (S16)

respectively, where is the selection intensity of the QGSI whereas the other terms were defined earlier. Equation (S14) to (S16) indicate that the LGSI and the QGSI are related, and the only difference between them is the trace of the quadratic terms.
